# Supplementary material
Source: Springer Nature journal article supplement (https://mijn.bsl.nl/resource/supplementary/13047_2010_137_MOESM1_ESM.pdf/7110004)
Supplement: MOESM1 [file 7110004]

Week 1: Observation of curtain use

Swabbing of 3 curtains to determine colony counts and ability to identify microorganisms

Week 3: 20 curtains identified and labelled, baseline swabs taken

Curtains sent for laundry

Week 4: Curtains returned and swabbed on opening package

Curtains re-hung in labelled cubicle

Week 5: 1 week post laundry - each curtain re-swabbed

Week 8: 3 weeks post laundry - final swabs taken
